# Supplementary material for: Association of sedentary and physical activity behaviours with body composition: a genome-wide association and Mendelian randomisation study
Source: PubMed Central journal article supplement — BMJ Open Sport Exerc Med. 2022 Aug 2;8(3):e001291. doi: 10.1136/bmjsem-2021-001291 (PMC9351346; doi:10.1136/bmjsem-2021-001291), 2022-08-02
Supplement: bmjsem-2021-001291supp001.pdf [file bmjsem-2021-001291supp001.pdf]

## Supplemental Tables and Figures

|                                                                                                                                                                                              |                                       |
|----------------------------------------------------------------------------------------------------------------------------------------------------------------------------------------------|---------------------------------------|
| <b>Table S1.</b> Participant Characteristics Included in the Genome-Wide Association Studies.....                                                                                            | 2                                     |
| <b>Table S2.</b> F Statistics for Mendelian Randomization Analyses for Physical Activity to Body Composition.....                                                                            | 3                                     |
| <b>Table S3.</b> MR-EGGER Intercept Estimates for Physical Activity to Body Composition.....                                                                                                 | 4                                     |
| <b>Table S4.</b> Heterogeneity estimates Mendelian Randomization Analyses for Physical Activity to Body Composition.....                                                                     | 5                                     |
| <b>Table S5.</b> MR-PRESSO Estimates for Physical Activity to Body Composition .....                                                                                                         | 6                                     |
| <b>Table S6.</b> MR Median-based Estimates for Physical Activity to Body Composition.....                                                                                                    | 7                                     |
| <b>Table S7.</b> MR Mode-based Estimates for Physical Activity to Body Composition.....                                                                                                      | 8                                     |
| <b>Table S8.</b> MR-EGGER Estimates for Physical Activity to Body Composition.....                                                                                                           | 9                                     |
| <b>Table S9.</b> CAUSE estimates for Physical Activity to Body Composition .....                                                                                                             | 10                                    |
| <b>Table S10.</b> Bidirectional MR IVW Estimates for Body Composition to Physical Activity .....                                                                                             | 11                                    |
| <b>Table S11.</b> SNP Exposure and Outcome Associations .....                                                                                                                                | Online Supplemental                   |
| <b>Figure S1.</b> Manhattan Plot and genome-wide significant SNPs for self-reported moderate PA .....                                                                                        | 142                                   |
| <b>Figure S2.</b> Manhattan Plot and genome-wide significant SNPs for accelerometer-measured MVPA .....                                                                                      | 153                                   |
| <b>Figure S3.</b> Univariable Mendelian Randomization IVW Estimates for Self-Reported Physical Activity Levels and Body Composition removing the <i>APOE rs429358</i> variant .....          | <b>Error! Bookmark not defined.</b> 4 |
| <b>Figure S4.</b> Univariable Mendelian Randomization IVW Estimates for Accelerometer-Measured Physical Activity Levels and Body Composition removing the <i>APOE rs429358</i> variant ..... | 15                                    |

## MENDELIAN RANDOMIZATION OF PHYSICAL ACTIVITY AND BODY COMPOSITION

2

**Table S1.** Participant Characteristics Included in the Genome-Wide Association Studies

| Phenotype                                           | Study                     | n                   | Women (%)  | Age, Years (mean $\pm$ SD)        | Trait Value (mean $\pm$ SD)     |
|-----------------------------------------------------|---------------------------|---------------------|------------|-----------------------------------|---------------------------------|
| <b>Self-report (hr./day)</b>                        |                           |                     |            |                                   |                                 |
| Sedentary Behavior                                  | UKB / van de Vegte et al. | 422,218             | 54.3       | 57.4 $\pm$ 8.0                    | 4.7 $\pm$ 2.7                   |
| Moderate PA                                         | UKB / Novel               | 360,912             | 53.4       | 56.7 $\pm$ 8.1                    | 1.2 $\pm$ 1.3                   |
| MVPA                                                | UKB / Klimentidis et al.  | 377,234             | 50.6       | 56.1 $\pm$ 8.2                    | 1.9 $\pm$ 1.8                   |
| Vigorous PA ( $\geq 3$ vs. 0 dys./wk.) <sup>†</sup> | UKB / Klimentidis et al.  | 98,060;<br>162,995  | 47.3; 58.1 | 55.4 $\pm$ 8.3;<br>57.4 $\pm$ 7.8 | 1.1 $\pm$ 0.9;<br>0.0 $\pm$ 0.0 |
| SSOE ( $>2-3$ vs 0 dys./wk.) <sup>†</sup>           | UKB / Klimentidis et al.  | 124,842;<br>225,650 | 38.1; 35.3 | 52.7 $\pm$ 8.1;<br>52.6 $\pm$ 7.9 | 1.1 $\pm$ 0.7;<br>0.0 $\pm$ 0.0 |
| <b>Accelerometer</b>                                |                           |                     |            |                                   |                                 |
| Sedentary Behavior <sup>§</sup>                     | UKB / Doherty et al.      | 91,105              | --         | --                                | --                              |
| MVPA <sup>‡</sup>                                   | UKB / Novel               | 97,737              | 56.1       | 56.2 $\pm$ 7.8                    | 0.0799 $\pm$ 0.0384             |
| Vigorous PA <sup>‡</sup>                            | UKB / Klimentidis et al.  | 90,667              | 56.1       | 56.2 $\pm$ 7.8                    | 0.0026 $\pm$ 0.0033             |
| Overall activity ( <i>milli-gravities</i> )         | UKB / Klimentidis et al.  | 91,105              | 56.1       | 56.2 $\pm$ 7.8                    | 27.1 $\pm$ 27.0                 |
| <b>Body Comp.</b>                                   |                           |                     |            |                                   |                                 |
| BMI ( $kg/m^2$ ) <sup>††</sup>                      | GIANT / Locke et al.      | 249,796             | --         | --                                | --                              |
| WHR <sup>††</sup>                                   | GIANT/ Shungin et al.     | 224,459             | --         | --                                | --                              |
| WC ( <i>cm</i> ) <sup>††</sup>                      | GIANT/ Shungin et al.     | 224,459             | --         | --                                | --                              |
| LBM ( <i>kg</i> ) <sup>††</sup>                     | GEFOS / Zillikens et al.  | 38,292              | --         | --                                | --                              |
| %TBF                                                | Lu et al.                 | 89,297              | 48.3       | 57.8 $\pm$ 9.4                    | 31.6 $\pm$ 6.7                  |
| VAT (Self-Report PA; <i>kg</i> )                    | UKB / Karlsson et al.     | 56,908              | 56.7       | 57.1 $\pm$ 7.8                    | 1.5 $\pm$ .86                   |
| VAT (Accel. PA; <i>kg</i> )                         | UKB / Karlsson et al.     | 323,769             | 53.8       | 56.9 $\pm$ 8.1                    | 1.4 $\pm$ .83                   |
| <b>Covariate</b>                                    |                           |                     |            |                                   |                                 |
| Educational Attainment                              | UKB / Okbay et al.        | 293,723             | 55.1       | 57.5 $\pm$ 8.0                    | 14.3 $\pm$ 3.6                  |

Abbreviations: PA, Physical Activity; MVPA, moderate-to-vigorous PA; SSOE, strenuous sports or other exercises; BMI, body mass index; WC, waist circumference; WHR, waist-to-hip ratio; LBM, lean body mass; %TBF, total body fat percent; VAT, visceral adipose tissue; UKB, UK Biobank, GIANT, Genetic Investigation of ANthropometric Traits consortium; GEFOS, GENetic Factors for Osteoporosis consortium.

<sup>†</sup>Phenotype was evaluated as a binary variable.

<sup>§</sup>Phenotype was trained on 153 free-living individuals to predict metabolic equivalent of tasks.

<sup>‡</sup>Phenotype was derived from fraction accelerations based on metabolic equivalent of tasks.

<sup>††</sup>Consortium demographics unavailable.

## MENDELIAN RANDOMIZATION OF PHYSICAL ACTIVITY AND BODY COMPOSITION

3

**Table S2.** F Statistics for Mendelian Randomization Analyses for Physical Activity to Body Composition

| Phenotypes         |            | Self-report MR |          |               | Accelerometer MR |          |              |
|--------------------|------------|----------------|----------|---------------|------------------|----------|--------------|
| Activity           | Body Comp. | Mean F         | Median F | Range F       | Mean F           | Median F | Range F      |
| Sedentary Behavior | LBM        | 45.75          | 38.97    | 30.41, 144.19 | 27.61            | 27.61    | 27.26, 27.95 |
|                    | BMI        | 45.32          | 38.55    | 30.41-144.19  | 25.34            | 25.2     | 23.01, 27.95 |
|                    | WHR        | 45.3           | 38.48    | 30.41-144.19  | 25.34            | 25.2     | 23.01, 27.95 |
|                    | WC         | 45.23          | 38.62    | 30.41-144.19  | 25.34            | 25.2     | 23.01, 27.95 |
|                    | %TBF       | 45.77          | 38.97    | 30.41-144.19  | 26.07            | 27.26    | 23.01, 27.95 |
|                    | VAT        | 42.71          | 37.3     | 30.41-144.19  | 26.4             | 26.69    | 23.09, 30.18 |
| Moderate PA        | LBM        | 23.40          | 23.39    | 21.52, 26.05  | --               | --       | --           |
|                    | BMI        | 23.41          | 23.37    | 21.12-30.38   | --               | --       | --           |
|                    | WHR        | 23.39          | 23.13    | 21.12-30.38   | --               | --       | --           |
|                    | WC         | 23.39          | 23.13    | 21.12-30.38   | --               | --       | --           |
|                    | %TBF       | 23.51          | 23.37    | 21.12-30.38   | --               | --       | --           |
|                    | VAT        | 23.09          | 22.77    | 21.02-30.38   | --               | --       | --           |
| MVPA               | LBM        | 25.85          | 24.16    | 20.97, 45.99  | 25.13            | 23.32    | 21.62, 33.12 |
|                    | BMI        | 25.94          | 24.41    | 20.88-45.99   | 24.83            | 23.4     | 20.91, 34.67 |
|                    | WHR        | 25.94          | 24.41    | 20.88-45.99   | 24.83            | 23.4     | 20.91, 34.67 |
|                    | WC         | 25.9           | 24.39    | 20.88-45.99   | 24.83            | 23.4     | 20.91, 34.67 |
|                    | %TBF       | 26.02          | 24.39    | 20.88-45.99   | 24.68            | 23.4     | 20.91, 34.67 |
|                    | VAT        | 25.75          | 23.9     | 20.86-45.99   | 24.06            | 23.24    | 20.92, 34.72 |
| Vigorous PA        | LBM        | 27.78          | 23.05    | 21.18, 55.26  | 23.56            | 22.58    | 20.88, 26.64 |
|                    | BMI        | 26.6           | 23.48    | 20.98-55.26   | 24.98            | 24.56    | 20.88, 36.07 |
|                    | WHR        | 26.73          | 23.54    | 20.98-55.26   | 24.98            | 24.56    | 20.88, 36.07 |
|                    | WC         | 26.47          | 23.42    | 20.98-55.26   | 24.98            | 24.56    | 20.88, 36.07 |
|                    | %TBF       | 27.07          | 23.54    | 20.98-55.26   | 24.98            | 24.56    | 20.88, 36.07 |
|                    | VAT        | 25.62          | 23.05    | 20.9-55.26    | 24.51            | 23.03    | 20.88, 36.76 |
| SSOE               | LBM        | 25.40          | 24.48    | 20.98, 37.34  | --               | --       | --           |
|                    | BMI        | 26.03          | 24.52    | 20.98-75.4    | --               | --       | --           |
|                    | WHR        | 25.99          | 24.65    | 20.98-75.4    | --               | --       | --           |
|                    | WC         | 26.09          | 24.59    | 20.98-75.4    | --               | --       | --           |
|                    | %TBF       | 26.17          | 24.65    | 20.98-75.4    | --               | --       | --           |
|                    | VAT        | 25.94          | 24.48    | 20.89-82.57   | --               | --       | --           |
| Overall Activity   | LBM        | --             | --       | --            | 25.16            | 24.84    | 22.66, 27.98 |
|                    | BMI        | --             | --       | --            | 24.54            | 23.76    | 22.66, 27.98 |
|                    | WHR        | --             | --       | --            | 24.54            | 23.76    | 22.66, 27.98 |
|                    | WC         | --             | --       | --            | 24.54            | 23.76    | 22.66, 27.98 |
|                    | %TBF       | --             | --       | --            | 24.54            | 23.76    | 22.66, 27.98 |
|                    | VAT        | --             | --       | --            | 24.45            | 24.84    | 21.28, 27.98 |

Abbreviations: MR, Mendelian randomization; PA, physical activity; MVPA, moderate-to-vigorous PA; SSOE, strenuous sports or other exercises; LBM, lean body mass; BMI, body mass index; WHR, waist-to-hip ratio; WC, waist circumference; %TBF, total body fat percent; VAT, visceral adipose tissue.

Note: An F statistic of 10 indicates that the bias of the IV estimator is 10% of the bias of the observational estimator.

## MENDELIAN RANDOMIZATION OF PHYSICAL ACTIVITY AND BODY COMPOSITION

4

**Table S3.** MR-EGGER Intercept Estimates for Physical Activity to Body Composition

| Phenotypes         |            | Self-Report MR     |          | Accelerometer MR   |          |
|--------------------|------------|--------------------|----------|--------------------|----------|
| Activity           | Body Comp. | MR-EGGER Intercept | <i>p</i> | MR-EGGER Intercept | <i>p</i> |
| Sedentary Behavior | LBM        | 0.025031           | 0.2958   | --                 | --       |
|                    | BMI        | -0.00449           | 0.3034   | 0.017358           | 0.64     |
|                    | WHR        | -0.00209           | 0.5284   | 0.00348            | 0.94     |
|                    | WC         | -0.00449           | 0.2279   | 0.002724           | 0.96     |
|                    | %TBF       | -0.01355           | 0.0073   | 0.052934           | 0.39     |
| Moderate PA        | VAT        | -0.00168           | 0.586    | 0.005832           | 0.59     |
|                    | LBM        | 0.037154           | 0.5654   | --                 | --       |
|                    | BMI        | 0.006266           | 0.3227   | --                 | --       |
|                    | WHR        | 0.001847           | 0.7752   | --                 | --       |
|                    | WC         | 0.0043             | 0.4634   | --                 | --       |
| MVPA               | %TBF       | -0.00217           | 0.7637   | --                 | --       |
|                    | VAT        | -0.00245           | 0.6182   | --                 | --       |
|                    | LBM        | 0.035138           | 0.34     | 0.035717           | 0.513    |
|                    | BMI        | 0.001909           | 0.5612   | -0.00662           | 0.36     |
|                    | WHR        | -0.00197           | 0.5577   | -0.00404           | 0.47     |
| Vigorous PA        | WC         | 0.002466           | 0.496    | -0.00533           | 0.44     |
|                    | %TBF       | 0.000303           | 0.9364   | -0.00891           | 0.18     |
|                    | VAT        | 0.004179           | 0.2116   | -0.00181           | 0.39     |
|                    | LBM        | 0.013209           | 0.753    | -0.41894           | 0.047    |
|                    | BMI        | -0.0054            | 0.216    | 0.004192           | 0.74     |
| SSOE               | WHR        | -0.00829           | 0.0331   | 0.004787           | 0.7      |
|                    | WC         | -0.0051            | 0.2259   | -0.00019           | 0.99     |
|                    | %TBF       | -0.00134           | 0.7813   | 0.026992           | 0.13     |
|                    | VAT        | -0.00144           | 0.7043   | -0.00095           | 0.8      |
|                    | LBM        | -0.00619           | 0.8902   | --                 | --       |
| Overall Activity   | BMI        | -0.00428           | 0.3557   | --                 | --       |
|                    | WHR        | -0.00214           | 0.549    | --                 | --       |
|                    | WC         | -0.00288           | 0.5143   | --                 | --       |
|                    | %TBF       | -0.00267           | 0.5652   | --                 | --       |
|                    | VAT        | -0.00182           | 0.5187   | --                 | --       |
| Overall Activity   | LBM        | --                 | --       | -0.3933            | 0.631    |
|                    | BMI        | --                 | --       | -0.1215            | 0.32     |
|                    | WHR        | --                 | --       | -0.06486           | 0.29     |
|                    | WC         | --                 | --       | -0.13557           | 0.23     |
|                    | %TBF       | --                 | --       | -0.03473           | 0.64     |
|                    | VAT        | --                 | --       | -0.00733           | 0.28     |

Abbreviations: MR, Mendelian randomization; PA, physical activity; MVPA, moderate-to-vigorous PA; SSOE, strenuous sports or other exercises; LBM, lean body mass; BMI, body mass index; WHR, waist-to-hip ratio; WC, waist circumference; %TBF, total body fat percent; VAT, visceral adipose tissue.

## MENDELIAN RANDOMIZATION OF PHYSICAL ACTIVITY AND BODY COMPOSITION

5

**Table S4.** Heterogeneity estimates Mendelian Randomization Analyses for Physical Activity to Body Composition

| Phenotypes         |            | Self-report MR |        | Self-report MVMR |        | Accelerometer MR |        | Accelerometer MVMR |        |
|--------------------|------------|----------------|--------|------------------|--------|------------------|--------|--------------------|--------|
| Activity           | Body Comp. | Q Stat.        | p      | Q Stat.          | p      | Q Stat.          | p      | Q Stat.            | p      |
| Sedentary Behavior | LBM        | 46.9           | 0.7435 | --               | --     | 22.2             | 0.035  | --                 | --     |
|                    | BMI        | 139.5          | <0.001 | --               | --     | 18.9             | <0.001 | 16.3               | 0.0121 |
|                    | WHR        | 82.4           | 0.0098 | 253.7            | <0.001 | 27               | <0.001 | 17.5               | 0.0077 |
|                    | WC         | 74             | 0.0766 | 145.1            | <0.001 | 19.9             | <0.001 | 18.2               | 0.0058 |
|                    | %TBF       | 86.3           | 0.002  | 141.1            | <0.001 | 11.8             | 0.0027 | 5.8                | 0.5654 |
| Moderate PA        | VAT        | 260.6          | <0.001 | 315.8            | <0.001 | 33.1             | <0.001 | 160.8              | <0.001 |
|                    | LBM        | 4.2            | 0.8959 | 21.3             | 0.03   | --               | --     | --                 | --     |
|                    | BMI        | 33.2           | 0.0321 | --               | --     | --               | --     | --                 | --     |
|                    | WHR        | 18.4           | 0.4927 | 279.6            | <0.001 | --               | --     | --                 | --     |
|                    | WC         | 24.8           | 0.1661 | 166.1            | <0.001 | --               | --     | --                 | --     |
| MVPA               | %TBF       | 13.9           | 0.788  | 150.8            | <0.001 | --               | --     | --                 | --     |
|                    | VAT        | 52             | 0.0077 | 477.9            | <0.001 | --               | --     | --                 | --     |
|                    | LBM        | 4.2            | 0.8959 | 21.3             | 0.03   | 18.9             | <0.001 | 13.1               | 0.2867 |
|                    | BMI        | 110.8          | <0.001 | --               | --     | 96.9             | <0.001 | --                 | --     |
|                    | WHR        | 91.2           | 0.0318 | 286.4            | <0.001 | 66.6             | <0.001 | 271.7              | <0.001 |
| Vigorous PA        | WC         | 94             | 0.0245 | 187              | <0.001 | 44.8             | 0.0089 | 171.8              | <0.001 |
|                    | %TBF       | 59.1           | 0.6155 | 160.6            | <0.001 | 34.3             | 0.0613 | 144.4              | <0.001 |
|                    | VAT        | 202.9          | <0.001 | 554.2            | <0.001 | 183.5            | <0.001 | 1709.7             | <0.001 |
|                    | LBM        | 21.7           | 0.2472 | 37.5             | 0.01   | 13.4             | 0.037  | 1.3                | 0.8616 |
|                    | BMI        | 71.4           | <0.001 | --               | --     | 20.4             | 0.119  | --                 | --     |
| SSOE               | WHR        | 47.1           | 0.1242 | 279.8            | <0.001 | 17.8             | 0.2154 | 278.4              | <0.001 |
|                    | WC         | 47.4           | 0.1685 | 153.3            | <0.001 | 13.7             | 0.4738 | 165.1              | <0.001 |
|                    | %TBF       | 34.1           | 0.3687 | 165.8            | <0.001 | 19               | 0.1666 | 162.6              | <0.001 |
|                    | VAT        | 148.8          | <0.001 | 538.1            | <0.001 | 90.8             | <0.001 | 1308.6             | <0.001 |
|                    | LBM        | 25.5           | 0.8799 | 42.4             | 0.453  | --               | --     | --                 | --     |
| Overall Activity   | BMI        | 190.7          | <0.001 | --               | --     | --               | --     | --                 | --     |
|                    | WHR        | 132.2          | <0.001 | 306.1            | <0.001 | --               | --     | --                 | --     |
|                    | WC         | 98             | 0.0386 | 173.4            | <0.001 | --               | --     | --                 | --     |
|                    | %TBF       | 51.1           | 0.9472 | 188.5            | <0.001 | --               | --     | --                 | --     |
|                    | VAT        | 182.3          | <0.001 | 458.4            | <0.001 | --               | --     | --                 | --     |
| Overall Activity   | LBM        | --             | --     | --               | --     | 4.1              | 0.1314 | 1.3                | 0.8616 |
|                    | BMI        | --             | --     | --               | --     | 20.6             | <0.001 | 38                 | <0.001 |
|                    | WHR        | --             | --     | --               | --     | 14               | 0.0029 | 35.4               | <0.001 |
|                    | WC         | --             | --     | --               | --     | 2.6              | 0.4596 | 27                 | 0.0046 |
|                    | %TBF       | --             | --     | --               | --     | 2.5              | 0.4674 | 15.8               | 0.1986 |
| VAT                | --         | --             | --     | --               | 11.5   | 0.0211           | 214.7  | <0.001             |        |

Abbreviations: MR, Mendelian randomization; MVMR, Multivariable Mendelian randomization; PA, physical activity; MVPA, moderate-to-vigorous PA; SSOE, strenuous sports or other exercises; LBM, lean body mass; BMI, body mass index; WHR, waist-to-hip ratio; WC, waist circumference; %TBF, total body fat percent; VAT, visceral adipose tissue.

Note: A large Q statistic and small p-value indicates instrument heterogeneity and potential violation of the MR assumptions. Where horizontal pleiotropy does not exist, observed values are expected to have smaller residuals, meaning that the variants do not deviate from the slope of the fitted regression. Inversely, variants deviating from the regression line suggest a pleiotropic effect.

## MENDELIAN RANDOMIZATION OF PHYSICAL ACTIVITY AND BODY COMPOSITION

6

**Table S5.** MR-PRESSO Estimates for Physical Activity to Body Composition

| Phenotypes         |            | Self-Report MR  |        | Accelerometer MR |        |
|--------------------|------------|-----------------|--------|------------------|--------|
| Activity           | Body Comp. | Causal Estimate | p      | Causal Estimate  | p      |
| Sedentary Behavior | LBM        | 0.26            | 0.3437 | 0.19*            | 0.0646 |
|                    | BMI        | 0.23            | <0.001 | 0.19*            | 0.1228 |
|                    | WHR        | 0.23            | <0.001 | 0.46**           | 0.0068 |
|                    | WC         | 0.24            | <0.001 | 0.43*            | 0.1844 |
|                    | %TBF       | 0.22            | 0.0011 | 0.02             | 0.8574 |
|                    | VAT        | 0.3             | <0.001 | 0.12*            | 0.1826 |
| Moderate PA        | LBM        | -0.44           | 0.5124 | --               | --     |
|                    | BMI        | 0.08            | 0.4447 | --               | --     |
|                    | WHR        | 0.22            | 0.0426 | --               | --     |
|                    | WC         | 0.16            | 0.09   | --               | --     |
|                    | %TBF       | 0.01            | 0.8836 | --               | --     |
|                    | VAT        | 0.13            | 0.2193 | --               | --     |
| MVPA               | LBM        | 0.23            | 0.5223 | 0.18             | 0.6794 |
|                    | BMI        | 0.08            | 0.1298 | -0.11*           | 0.014  |
|                    | WHR        | -0.05           | 0.3468 | -0.06            | 0.2577 |
|                    | WC         | 0               | 0.9948 | -0.06*           | 0.2203 |
|                    | %TBF       | -0.11           | 0.0588 | -0.17            | 0.0114 |
|                    | VAT        | -0.08           | 0.2327 | 0*               | 0.9618 |
| Vigorous PA        | LBM        | 0.03            | 0.9778 | 0.98             | 0.3291 |
|                    | BMI        | -0.11           | 0.3991 | -0.08            | 0.1982 |
|                    | WHR        | -0.23           | 0.0379 | -0.06            | 0.2683 |
|                    | WC         | -0.16           | 0.2133 | -0.09            | 0.1648 |
|                    | %TBF       | -0.1            | 0.4995 | -0.22            | 0.0195 |
|                    | VAT        | -0.12           | 0.3949 | -0.09*           | 0.0106 |
| SSOE               | LBM        | -0.4            | 0.6289 | --               | --     |
|                    | BMI        | -0.49*          | <0.001 | --               | --     |
|                    | WHR        | -0.21           | 0.0261 | --               | --     |
|                    | WC         | -0.3*           | 0.0124 | --               | --     |
|                    | %TBF       | -0.41           | <0.001 | --               | --     |
|                    | VAT        | -0.33**         | 0.003  | --               | --     |
| Overall Activity   | LBM        | --              | --     | 0.05             | 0.205  |
|                    | BMI        | --              | --     | -0.31            | 0.0638 |
|                    | WHR        | --              | --     | -0.16*           | 0.4411 |
|                    | WC         | --              | --     | -0.16            | 0.139  |
|                    | %TBF       | --              | --     | -0.28*           | 0.3675 |
|                    | VAT        | --              | --     | -0.05*           | 0.3327 |

Abbreviations: MR, Mendelian randomization; PA, physical activity; MVPA, moderate-to-vigorous PA; SSOE, strenuous sports or other exercises; LBM, lean body mass; BMI, body mass index; WHR, waist-to-hip ratio; WC, waist circumference; %TBF, total body fat percent; VAT, visceral adipose tissue.

Note: MR-PRESSO evaluates for global pleiotropic effects by comparing the residual sum of squares with the expected distance under the null hypothesis for no horizontal pleiotropy. Individual pleiotropic outliers are identified by examining the observed and expected distributions of each variant; \*Value was corrected for outliers; \*\* MR-PRESSO estimate reached significance after outlier correction.

## MENDELIAN RANDOMIZATION OF PHYSICAL ACTIVITY AND BODY COMPOSITION

7

**Table S6.** MR Median-based Estimates for Physical Activity to Body Composition

| Phenotypes         |            | Self-Report MR |       |              | Accelerometer MR |       |              |
|--------------------|------------|----------------|-------|--------------|------------------|-------|--------------|
| Activity           | Body Comp. | SNPs (#)       | beta  | 95% CI       | SNPs (#)         | beta  | 95% CI       |
| Sedentary Behavior | LBM        | 55             | 0.32  | -0.54, 1.18  | 4                | 0.26  | 0.05, 0.46   |
|                    | BMI        | 55             | 0.22  | 0.11, 0.33   | 4                | 0.35  | 0.07, 0.64   |
|                    | WHR        | 56             | 0.24  | 0.12, 0.37   | 4                | 0.42  | 0.21, 0.63   |
|                    | WC         | 59             | 0.22  | 0.11, 0.33   | 3                | -0.13 | -0.5, 0.24   |
|                    | %TBF       | 53             | 0.34  | 0.18, 0.49   | 6                | 0.07  | -0.08, 0.22  |
|                    | VAT        | 128            | 0.24  | 0.2, 0.28    | 4                | 0.26  | 0.05, 0.46   |
| Moderate PA        | LBM        | 10             | 0.13  | -2.26, 2.52  | --               | --    | --           |
|                    | BMI        | 21             | 0.11  | -0.11, 0.32  | --               | --    | --           |
|                    | WHR        | 20             | 0.15  | -0.1, 0.4    | --               | --    | --           |
|                    | WC         | 21             | 0.22  | -0.02, 0.46  | --               | --    | --           |
|                    | %TBF       | 20             | -0.05 | -0.35, 0.25  | --               | --    | --           |
|                    | VAT        | 32             | 0.03  | -0.05, 0.12  | --               | --    | --           |
| MVPA               | LBM        | 39             | 0.57  | -0.72, 1.86  | 14               | 0.25  | -0.9, 1.4    |
|                    | BMI        | 72             | 0.06  | -0.06, 0.18  | 25               | -0.1  | -0.2, 0      |
|                    | WHR        | 72             | 0.03  | -0.11, 0.16  | 26               | -0.03 | -0.15, 0.09  |
|                    | WC         | 72             | -0.02 | -0.15, 0.1   | 26               | -0.06 | -0.18, 0.06  |
|                    | %TBF       | 66             | -0.12 | -0.28, 0.05  | 24               | -0.15 | -0.3, -0.01  |
|                    | VAT        | 93             | -0.07 | -0.12, -0.01 | 46               | -0.09 | -0.16, -0.03 |
| Vigorous PA        | LBM        | 36             | 0.22  | -2.43, 2.86  | 3                | -1.07 | -3.24, 1.09  |
|                    | BMI        | 38             | -0.05 | -0.33, 0.23  | 15               | -0.12 | -0.25, 0.01  |
|                    | WHR        | 38             | 0.09  | -0.22, 0.39  | 15               | -0.06 | -0.23, 0.11  |
|                    | WC         | 40             | -0.2  | -0.49, 0.1   | 15               | -0.08 | -0.23, 0.06  |
|                    | %TBF       | 33             | -0.07 | -0.44, 0.3   | 15               | -0.2  | -0.4, 0      |
|                    | VAT        | 61             | -0.14 | -0.24, -0.04 | 26               | -0.19 | -0.28, -0.1  |
| SSOE               | LBM        | 19             | 0.64  | -2.57, 3.84  | --               | --    | --           |
|                    | BMI        | 74             | -0.34 | -0.59, -0.1  | --               | --    | --           |
|                    | WHR        | 74             | -0.12 | -0.38, 0.15  | --               | --    | --           |
|                    | WC         | 77             | -0.06 | -0.31, 0.19  | --               | --    | --           |
|                    | %TBF       | 72             | -0.26 | -0.59, 0.07  | --               | --    | --           |
|                    | VAT        | 98             | -0.31 | -0.41, -0.21 | --               | --    | --           |
| Overall Activity   | LBM        | --             | --    | --           | 7                | 1.12  | -0.7, 2.93   |
|                    | BMI        | --             | --    | --           | 4                | -0.18 | -0.43, 0.07  |
|                    | WHR        | --             | --    | --           | 4                | -0.16 | -0.41, 0.1   |
|                    | WC         | --             | --    | --           | 4                | -0.14 | -0.35, 0.07  |
|                    | %TBF       | --             | --    | --           | 4                | -0.29 | -0.59, 0.02  |
|                    | VAT        | --             | --    | --           | 6                | -0.21 | -0.38, -0.03 |

Abbreviations: MR, Mendelian randomization; SNPs, single nucleotide polymorphisms; PA, physical activity; MVPA, moderate-to-vigorous PA; SSOE, strenuous sports or other exercises; LBM, lean body mass; BMI, body mass index; WHR, waist-to-hip ratio; WC, waist circumference; %TBF, total body fat percent; VAT, visceral adipose tissue.

Note: The weighted median causal estimates are based on the relationship between the strength of association between the SNP and exposure, and the SNP and outcome associations.

## MENDELIAN RANDOMIZATION OF PHYSICAL ACTIVITY AND BODY COMPOSITION

8

**Table S7.** MR Mode-based Estimates for Physical Activity to Body Composition

| Phenotypes         |            | Self-Report MR |       |              | Accelerometer MR |       |              |
|--------------------|------------|----------------|-------|--------------|------------------|-------|--------------|
| Activity           | Body Comp. | SNPs (#)       | beta  | 95% CI       | SNPs (#)         | beta  | 95% CI       |
| Sedentary Behavior | LBM        | 55             | 0.38  | -1.53, 2.29  | 4                | 0.24  | 0.02, 0.46   |
|                    | BMI        | 55             | 0.21  | -0.03, 0.44  | 4                | 0.37  | -0.08, 0.82  |
|                    | WHR        | 56             | 0.23  | -0.01, 0.48  | 4                | 0.44  | 0.19, 0.69   |
|                    | WC         | 59             | 0.16  | -0.08, 0.39  | 3                | -0.2  | -0.58, 0.18  |
|                    | %TBF       | 53             | 0.46  | 0.17, 0.75   | 6                | 0.03  | -0.17, 0.24  |
|                    | VAT        | 128            | 0.24  | 0.13, 0.36   | 4                | 0.24  | 0.02, 0.46   |
| Moderate PA        | LBM        | 10             | 0.4   | -3.55, 4.35  | --               | --    | --           |
|                    | BMI        | 21             | 0.21  | -0.21, 0.64  | --               | --    | --           |
|                    | WHR        | 20             | 0.14  | -0.36, 0.63  | --               | --    | --           |
|                    | WC         | 21             | 0.2   | -0.29, 0.69  | --               | --    | --           |
|                    | %TBF       | 20             | -0.19 | -0.75, 0.36  | --               | --    | --           |
|                    | VAT        | 32             | 0.04  | -0.13, 0.21  | --               | --    | --           |
| MVPA               | LBM        | 39             | 0.62  | -2.2, 3.45   | 14               | 0.69  | -1.56, 2.93  |
|                    | BMI        | 72             | -0.01 | -0.32, 0.29  | 25               | -0.1  | -0.27, 0.07  |
|                    | WHR        | 72             | 0.1   | -0.24, 0.44  | 26               | -0.06 | -0.3, 0.18   |
|                    | WC         | 72             | 0.05  | -0.23, 0.32  | 26               | -0.06 | -0.34, 0.23  |
|                    | %TBF       | 66             | -0.2  | -0.57, 0.17  | 24               | -0.19 | -0.44, 0.06  |
|                    | VAT        | 93             | -0.04 | -0.17, 0.09  | 46               | -0.03 | -0.18, 0.11  |
| Vigorous PA        | LBM        | 36             | 3.5   | -2.73, 9.74  | 3                | -1.73 | -4.91, 1.46  |
|                    | BMI        | 38             | -0.15 | -0.86, 0.56  | 15               | -0.17 | -0.38, 0.03  |
|                    | WHR        | 38             | 0.36  | -0.17, 0.88  | 15               | -0.05 | -0.32, 0.22  |
|                    | WC         | 40             | 0.4   | -0.27, 1.07  | 15               | -0.09 | -0.35, 0.17  |
|                    | %TBF       | 33             | 0.44  | -0.44, 1.32  | 15               | -0.27 | -0.57, 0.03  |
|                    | VAT        | 61             | -0.09 | -0.34, 0.15  | 26               | -0.23 | -0.39, -0.06 |
| SSOE               | LBM        | 19             | 4.44  | -2.06, 10.93 | --               | --    | --           |
|                    | BMI        | 74             | -0.51 | -1.18, 0.16  | --               | --    | --           |
|                    | WHR        | 74             | 0.04  | -0.85, 0.93  | --               | --    | --           |
|                    | WC         | 77             | 0.13  | -0.48, 0.74  | --               | --    | --           |
|                    | %TBF       | 72             | 0.05  | -0.67, 0.78  | --               | --    | --           |
|                    | VAT        | 98             | -0.37 | -0.73, 0     | --               | --    | --           |
| Overall Activity   | LBM        | --             | --    | --           | 7                | 2.56  | -0.86, 5.98  |
|                    | BMI        | --             | --    | --           | 4                | -0.04 | -0.55, 0.46  |
|                    | WHR        | --             | --    | --           | 4                | -0.04 | -0.34, 0.26  |
|                    | WC         | --             | --    | --           | 4                | -0.28 | -0.61, 0.05  |
|                    | %TBF       | --             | --    | --           | 4                | -0.26 | -0.67, 0.15  |
|                    | VAT        | --             | --    | --           | 6                | -0.17 | -0.39, 0.06  |

Abbreviations: MR, Mendelian randomization; SNPs, single nucleotide polymorphisms; PA, physical activity; MVPA, moderate-to-vigorous PA; SSOE, strenuous sports or other exercises; LBM, lean body mass; BMI, body mass index; WHR, waist-to-hip ratio; WC, waist circumference; %TBF, total body fat percent; VAT, visceral adipose tissue.

Note: The weighted mode causal estimates are based on the relationship between the strength of association between the SNP and exposure, and the SNP and outcome associations. The weighted-mode estimate uses the property that valid instruments should provide the largest number of similar individual-instrument causal estimates even if the majority of instruments is invalid.



## MENDELIAN RANDOMIZATION OF PHYSICAL ACTIVITY AND BODY COMPOSITION

9

**Table S8.** MR-EGGER Estimates for Physical Activity to Body Composition

| Phenotypes         |            | Self-Report MR |       |             | Accelerometer MR |       |              |
|--------------------|------------|----------------|-------|-------------|------------------|-------|--------------|
| Activity           | Body Comp. | SNPs (#)       | beta  | 95% CI      | SNPs (#)         | beta  | 95% CI       |
| Sedentary Behavior | LBM        | 55             | 0     | -0.24, 0.24 | 4                | -0.25 | -1.24, 0.74  |
|                    | BMI        | 55             | 0.53  | 0, 1.06     | 4                | -0.32 | -2.81, 2.17  |
|                    | WHR        | 56             | 0.54  | 0.1, 0.99   | 4                | 0.33  | -3.35, 4.02  |
|                    | WC         | 59             | 0.37  | -0.03, 0.77 | 3                | 0.14  | -3.02, 3.29  |
|                    | %TBF       | 53             | 1.03  | 0.45, 1.62  | 6                | -1.87 | -4.7, 0.95   |
|                    | VAT        | 128            | 0.34  | 0.13, 0.56  | 4                | 0     | -0.69, 0.69  |
| Moderate PA        | LBM        | 10             | -0.05 | -0.26, 0.15 | --               | --    | --           |
|                    | BMI        | 21             | -0.36 | -1.23, 0.51 | --               | --    | --           |
|                    | WHR        | 20             | -0.14 | -0.95, 0.67 | --               | --    | --           |
|                    | WC         | 21             | 0.09  | -0.81, 0.99 | --               | --    | --           |
|                    | %TBF       | 20             | 0.18  | -0.82, 1.18 | --               | --    | --           |
|                    | VAT        | 32             | 0.08  | -0.21, 0.38 | --               | --    | --           |
| MVPA               | LBM        | 39             | -0.15 | -0.35, 0.05 | 14               | 0.03  | -0.08, 0.15  |
|                    | BMI        | 72             | -0.08 | -0.57, 0.41 | 25               | 0.11  | -0.44, 0.66  |
|                    | WHR        | 72             | -0.2  | -0.74, 0.35 | 26               | 0.1   | -0.44, 0.63  |
|                    | WC         | 72             | 0.11  | -0.4, 0.61  | 26               | 0.1   | -0.33, 0.54  |
|                    | %TBF       | 66             | -0.12 | -0.7, 0.46  | 24               | 0.18  | -0.32, 0.68  |
|                    | VAT        | 93             | -0.18 | -0.4, 0.03  | 46               | -0.09 | -0.24, 0.06  |
| Vigorous PA        | LBM        | 36             | 0.35  | -0.05, 0.75 | 3                | 0.18  | -0.39, 0.75  |
|                    | BMI        | 38             | 0.62  | -0.41, 1.65 | 15               | -0.26 | -1.31, 0.8   |
|                    | WHR        | 38             | 0.55  | -0.44, 1.53 | 15               | -0.09 | -1.26, 1.09  |
|                    | WC         | 40             | 0.81  | -0.08, 1.71 | 15               | -0.27 | -1.27, 0.74  |
|                    | %TBF       | 33             | 0.05  | -1.07, 1.17 | 15               | -1.37 | -2.76, 0.03  |
|                    | VAT        | 61             | 0.05  | -0.2, 0.3   | 26               | -0.24 | -0.51, 0.02  |
| SSOE               | LBM        | 19             | 0.01  | -0.3, 0.31  | --               | --    | --           |
|                    | BMI        | 74             | 0.32  | -1.08, 1.72 | --               | --    | --           |
|                    | WHR        | 74             | 0.2   | -1.13, 1.54 | --               | --    | --           |
|                    | WC         | 77             | 0.1   | -0.98, 1.18 | --               | --    | --           |
|                    | %TBF       | 72             | 0.01  | -1.41, 1.42 | --               | --    | --           |
|                    | VAT        | 98             | -0.09 | -0.45, 0.26 | --               | --    | --           |
| Overall Activity   | LBM        | --             | --    | --          | 7                | 0.14  | -0.07, 0.35  |
|                    | BMI        | --             | --    | --          | 4                | 4.15  | -2.54, 10.84 |
|                    | WHR        | --             | --    | --          | 4                | 4.58  | -1.08, 10.24 |
|                    | WC         | --             | --    | --          | 4                | 2.19  | -1.08, 5.46  |
|                    | %TBF       | --             | --    | --          | 4                | 0.95  | -3.56, 5.47  |
|                    | VAT        | --             | --    | --          | 6                | -0.25 | -1.08, 0.57  |

Abbreviations: MR, Mendelian randomization; SNPs, single nucleotide polymorphisms; PA, physical activity; MVPA, moderate-to-vigorous PA; SSOE, strenuous sports or other exercises; LBM, lean body mass; BMI, body mass index; WHR, waist-to-hip ratio; WC, waist circumference; %TBF, total body fat percent; VAT, visceral adipose tissue.

Note: MR-Egger regression assumes linearity and homogeneity in the associations between the genetic variants, risk factor, and outcome. Egger regression provides an estimate of the causal effect that is consistent asymptotically even if all the genetic variants have pleiotropic effects on the outcome.

## MENDELIAN RANDOMIZATION OF PHYSICAL ACTIVITY AND BODY COMPOSITION

10

**Table S9.** CAUSE estimates for Physical Activity to Body Composition

| Phenotypes         |            | Self-Report MR |               | Accelerometer MR |                 |
|--------------------|------------|----------------|---------------|------------------|-----------------|
| Activity           | Body Comp. | Effect         | 95% CI        | Effect           | 95% CI          |
| Sedentary Behavior | LBM        | 0.00           | -0.36, 0.40   | 0.42             | -1.04, 1.85     |
|                    | BMI        | 0.14           | 0.10, 0.18**  | 0.05             | -0.06, 0.17     |
|                    | WHR        | 0.13           | 0.08, 0.17**  | 0.02             | -0.12, 0.17     |
|                    | WC         | 0.16           | 0.11, 0.20**  | 0.03             | -0.15, 0.20     |
|                    | %TBF       | 0.17           | 0.11, 0.24    | 0.12             | -0.08, 0.33     |
|                    | VAT        | 0.23           | 0.19, 0.28*** | 0.10             | -0.01, 0.21     |
| Moderate PA        | LBM        | -0.69          | -2.18, 0.81   | --               | --              |
|                    | BMI        | 0.07           | -0.11, 0.26   | --               | --              |
|                    | WHR        | 0.20           | 0.02, 0.39    | --               | --              |
|                    | WC         | 0.13           | -0.10, 0.36   | --               | --              |
|                    | %TBF       | 0.04           | -0.24, 0.32   | --               | --              |
|                    | VAT        | 0.25           | 0.02, 0.47    | --               | --              |
| MVPA               | LBM        | 0.51           | -0.15, 1.24   | 0.00             | -0.47, 0.47     |
|                    | BMI        | -0.02          | -0.11, 0.07   | -0.13            | -0.19, -0.07    |
|                    | WHR        | -0.03          | -0.11, 0.06   | -0.08            | -0.15, -0.02    |
|                    | WC         | -0.03          | -0.12, 0.07   | -0.12            | -0.19, -0.05    |
|                    | %TBF       | -0.08          | -0.20, 0.03   | -0.11            | -0.19, -0.03    |
|                    | VAT        | -0.06          | -0.16, 0.04   | -0.11            | -0.15, -0.07*** |
| Vigorous PA        | LBM        | 0.59           | -0.84, 2.05   | 0.15             | -0.42, 0.75     |
|                    | BMI        | 0.00           | -0.18, 0.19   | -0.08            | -0.16, 0.01     |
|                    | WHR        | -0.03          | -0.20, 0.14   | -0.02            | -0.10, 0.06     |
|                    | WC         | 0.02           | -0.16, 0.21   | -0.07            | -0.16, 0.02     |
|                    | %TBF       | -0.11          | -0.34, 0.12   | -0.07            | -0.19, 0.05     |
|                    | VAT        | -0.13          | -0.33, 0.06   | -0.14            | -0.19, -0.08*** |
| SSOE               | LBM        | 1.36           | -0.19, 2.82   | --               | --              |
|                    | BMI        | -0.19          | -0.36, -0.02  | --               | --              |
|                    | WHR        | -0.22          | -0.37, -0.08  | --               | --              |
|                    | WC         | -0.22          | -0.39, -0.05  | --               | --              |
|                    | %TBF       | -0.34          | -0.56, -0.11  | --               | --              |
|                    | VAT        | -0.28          | -0.46, -0.11  | --               | --              |
| Overall Activity   | LBM        | --             | --            | 0.18             | -0.98, 1.31     |
|                    | BMI        | --             | --            | -0.12            | -0.28, 0.04     |
|                    | WHR        | --             | --            | -0.09            | -0.25, 0.08     |
|                    | WC         | --             | --            | -0.11            | -0.30, 0.07     |
|                    | %TBF       | --             | --            | -0.17            | -0.35, 0.02     |
|                    | VAT        | --             | --            | -0.08            | -0.19, 0.03     |

Abbreviations: MR, Mendelian randomization; SNPs, single nucleotide polymorphisms; PA, physical activity; MVPA, moderate-to-vigorous PA; SSOE, strenuous sports or other exercises; LBM, lean body mass; BMI, body mass index; WHR, waist-to-hip ratio; WC, waist circumference; %TBF, total body fat percent; VAT, visceral adipose tissue. Note: \*\*\*p<.001, \*\*p<.01

## MENDELIAN RANDOMIZATION OF PHYSICAL ACTIVITY AND BODY COMPOSITION

11

**Table S10.** Bidirectional MR IVW Estimates for Body Composition to Physical Activity

| Body Comp.       | Phenotypes<br>Activity | Self-Report MR |       |             | Accelerometer MR |       |              |
|------------------|------------------------|----------------|-------|-------------|------------------|-------|--------------|
|                  |                        | SNPs (#)       | beta  | 95% CI      | SNPs (#)         | beta  | 95% CI       |
| LBM <sup>†</sup> | Sedentary Behavior     | 15             | 0.00  | -0.00, 0.00 | --               | --    | --           |
|                  | Moderate PA            | 16             | 0.00  | -0.01, 0.00 | --               | --    | --           |
|                  | MVPA                   | 16             | 0.00  | -0.00, 0.01 | 16               | 0.00  | 0.00, 0.01   |
|                  | Vigorous PA            | 16             | 0.00  | -0.00, 0.00 | 16               | 0.01  | 0.00, 0.02   |
|                  | SSOE                   | 16             | 0.00  | -0.00, 0.00 | --               | --    | --           |
|                  | Overall Activity       | --             | --    | --          | --               | --    | --           |
| BMI              | Sedentary Behavior     | 67             | 0.09  | 0.08, 0.10  | 11               | 0.12  | -0.03, 0.26  |
|                  | Moderate PA            | 78             | 0.01  | -0.02, 0.03 | 12               | -0.04 | -0.16, 0.07  |
|                  | MVPA                   | 78             | -0.01 | -0.04, 0.03 | 71               | -0.03 | -0.08, 0.02  |
|                  | Vigorous PA            | 78             | 0.01  | -0.01, 0.03 | 71               | -0.08 | -0.13, -0.04 |
|                  | SSOE                   | 78             | 0.00  | -0.02, 0.02 | --               | --    | --           |
|                  | Overall Activity       | --             | --    | --          | 11               | -0.03 | -0.17, 0.11  |
| %TBF             | Sedentary Behavior     | 6              | 0.12  | -0.04, 0.29 | 2                | 0.11  | -0.18, 0.40  |
|                  | Moderate PA            | 9              | -0.05 | -0.10, 0.00 | 2                | 0.07  | -0.16, 0.31  |
|                  | MVPA                   | 9              | -0.05 | -0.17, 0.05 | 9                | -0.02 | -0.14, 0.10  |
|                  | Vigorous PA            | 9              | -0.00 | -0.06, 0.05 | 9                | -0.00 | -0.11, 0.10  |
|                  | SSOE                   | 9              | 0.01  | -0.03, 0.04 | --               | --    | --           |
|                  | Overall Activity       | --             | --    | --          | 2                | 0.07  | -0.3, 0.45   |
| VAT              | Sedentary Behavior     | 18             | 0.05  | -0.01, 0.11 | 28               | 0.23  | 0.10, 0.36   |
|                  | Moderate PA            | 19             | -0.01 | -0.05, 0.03 | 29               | -0.12 | -0.25, 0.01  |
|                  | MVPA                   | 17             | 0.02  | -0.03, 0.07 | 236              | -0.17 | -0.22, -0.12 |
|                  | Vigorous PA            | 17             | 0.03  | 0.00, 0.06  | 211              | -0.19 | -0.23, -0.14 |
|                  | SSOE                   | 17             | 0.03  | 0.02, 0.05  | --               | --    | --           |
|                  | Overall Activity       | --             | --    | --          | 27               | -0.10 | -0.25, 0.05  |

Abbreviations: MR, Mendelian randomization; SNPs, single nucleotide polymorphisms; LBM, lean body mass; BMI, body mass index; %TBF, total body fat percent; VAT, visceral adipose tissue; PA, physical activity; MVPA, moderate-to-vigorous PA; SSOE, strenuous sports or other exercises.

<sup>†</sup>LBM contained one SNPs at the genome-wide significance level; a reduced IV threshold ( $p < 5 \times 10^{-6}$ ) was used for analyses. Outcome SNPs could not be identified in GWAS of sedentary behavior, moderate PA, or overall activity.

## MENDELIAN RANDOMIZATION OF PHYSICAL ACTIVITY AND BODY COMPOSITION

12

| SNP ID    | Chromosome | Position | Gene  | Allele | EAF    | B       | SE     | <i>p</i> |
|-----------|------------|----------|-------|--------|--------|---------|--------|----------|
| rs6545389 | 2          | 54386901 | ACYP2 | A / G  | 0.4997 | -0.0127 | 0.0023 | 3.5e-08  |

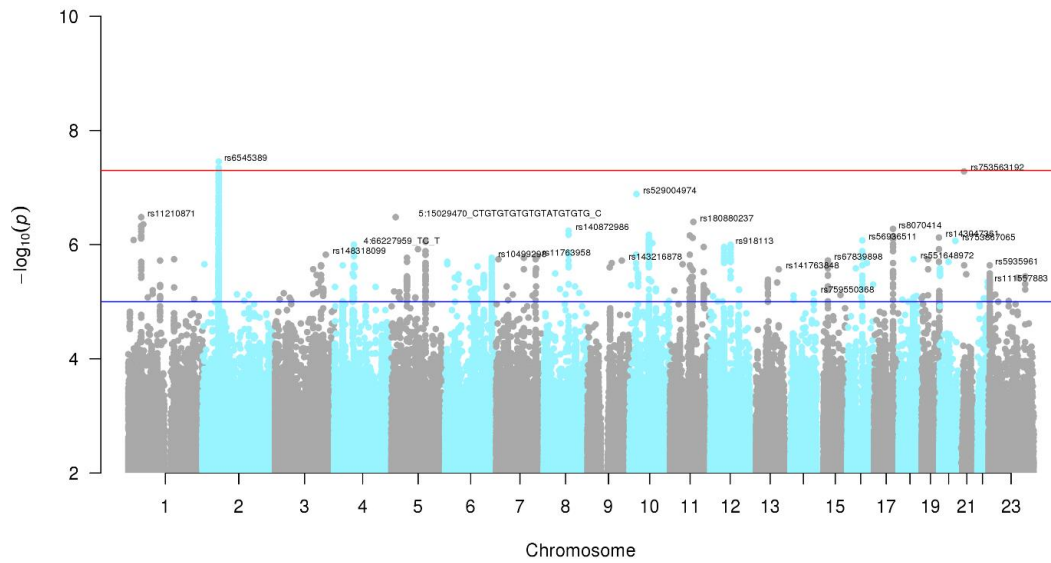

**Figure S1.** Manhattan Plot and genome-wide significant SNPs for self-reported moderate PA

## MENDELIAN RANDOMIZATION OF PHYSICAL ACTIVITY AND BODY COMPOSITION

13

| SNP ID     | Chromosome | Position  | Gene     | Allele | EAF    | B      | SE     | <i>p</i> |
|------------|------------|-----------|----------|--------|--------|--------|--------|----------|
| rs4480415  | 1          | 174800121 | RABGAP1L | G / A  | 0.7248 | -0.012 | 0.0023 | 4.6e-08  |
| rs17443704 | 5          | 151668231 | --       | G / A  | 0.8231 | -0.013 | 0.0023 | 3.5e-08  |

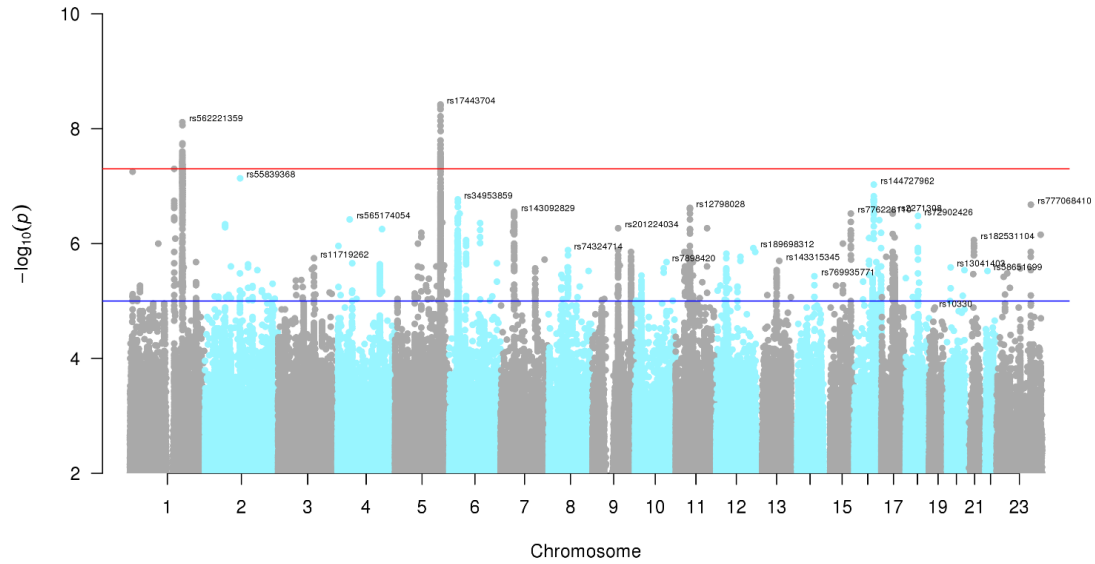

**Figure S2.** Manhattan Plot and genome-wide significant SNPs for accelerometer-measured MVPA

## MENDELIAN RANDOMIZATION OF PHYSICAL ACTIVITY AND BODY COMPOSITION

14

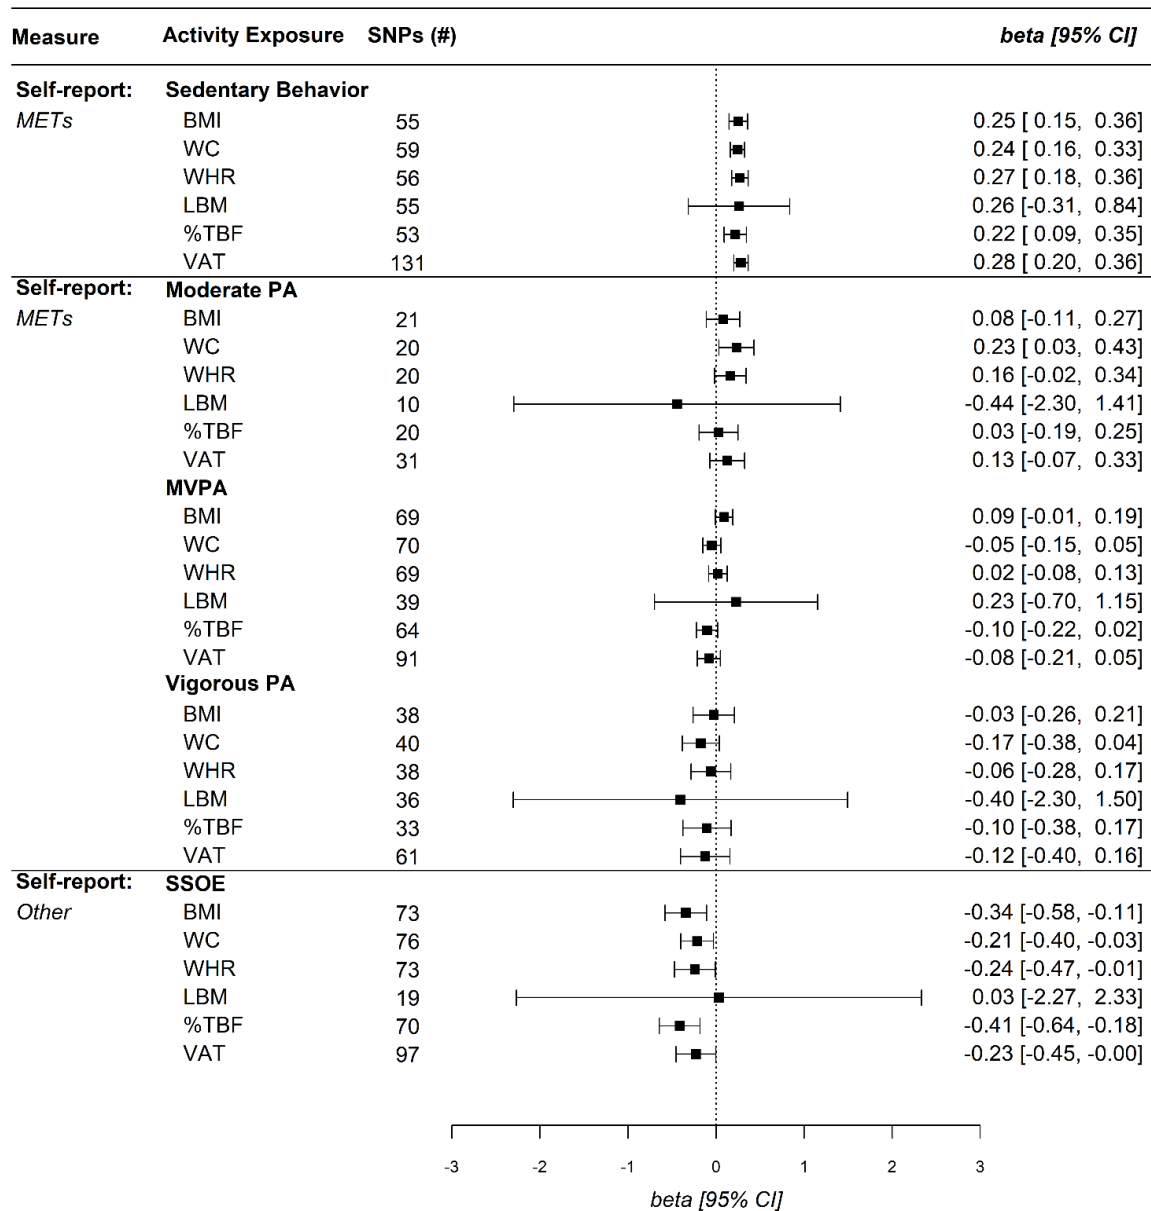

**Figure S3.** Univariable Mendelian Randomization IVW Sensitivity Analysis for Self-Reported Physical Activity Levels and Body Composition removing the *APOE* rs429358 variant. Abbreviations: SNPs, single nucleotide polymorphisms; CI, confidence interval; METs, metabolic equivalent of tasks; BMI, body mass index; WC, waist circumference; WHR, waist-to-hip ratio; LBM, lean body mass; %TBF, total body fat percent; VAT, visceral adipose tissue; MVPA, moderate-to-vigorous PA; SSOE, strenuous sports or other exercises.

## MENDELIAN RANDOMIZATION OF PHYSICAL ACTIVITY AND BODY COMPOSITION

15

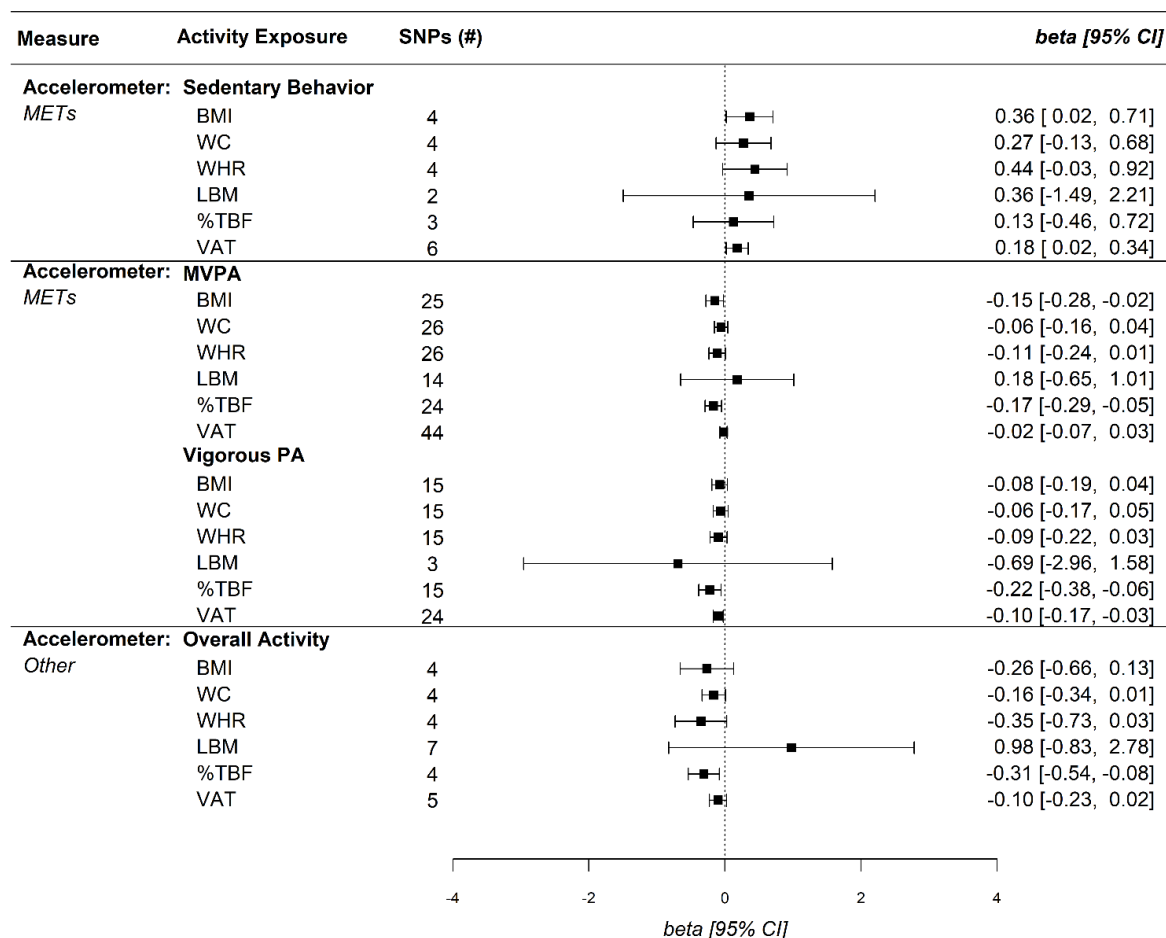

**Figure S4.** Univariable Mendelian Randomization IVW Sensitivity Analysis for Accelerometer-Measured Physical Activity Levels and Body Composition removing the *APOE* rs429358 variant. Abbreviations: SNPs, single nucleotide polymorphisms; CI, confidence interval; METs, metabolic equivalent of tasks; BMI, body mass index; WC, waist circumference; WHR, waist-to-hip ratio; LBM, lean body mass; %TBF, total body fat percent; VAT, visceral adipose tissue; MVPA, moderate-to-vigorous PA.
